# Supplementary material for: Carbonaceous microspheres prepared by hydrothermal carbonization of glucose for direct use in catalytic dehydration of fructose
Source: Royal Society of Chemistry journal article supplement (doi:10.1039/c4ra15296d), 2015-01-01
Supplement: c4ra15296d1.pdf [file c4ra15296d1.pdf]

## Supporting information for

# Carbonaceous microspheres prepared by hydrothermal carbonization of glucose for direct use in catalytic dehydration of fructose

Xinhua Qi<sup>a,b,\*</sup>, Nian Liu<sup>b</sup>, Youfen Lian<sup>b</sup>

<sup>a</sup> Agro-Environmental Protection Institute, The Ministry of Agriculture, Tianjin 300191, China

<sup>b</sup> Tianjin Biomass Solid Waste Reclamation Technology and Engineering Center, College of Environmental Science and Engineering, Nankai University, Tianjin 300071, China

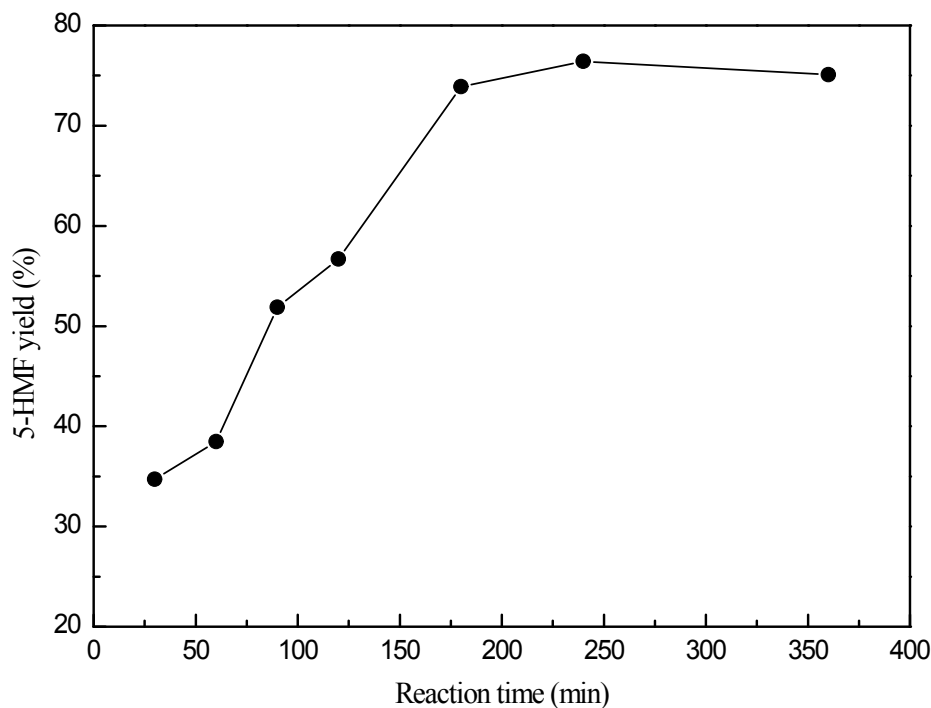

Figure S1. Catalytic conversion of fructose into 5-HMF by acetic acid in ionic liquid [BMIM][Cl] (conditions: 100 °C, 1 g [BMIM]Cl, 0.01 g fructose, 0.108 mmol acetic acid)

\* Corresponding author. Email: [qixinhua@nankai.edu.cn](mailto:qixinhua@nankai.edu.cn) (X. Qi); Tel (Fax): 86-22-2350-8807.
